# Supplementary material
Source: publisher figshare collection journal article supplement (https://tandf.figshare.com/articles/dataset/_/1294963)
Supplement: Supplementary file 1 [file 1]

ONLINE SUPPLEMENTARY INFORMATION

JOURNAL OF VERTEBRATE PALEONTOLOGY

A re-evaluation of *Pliophoca etrusca* (Pinnipedia, Phocidae) from the Pliocene of  
Italy: phylogenetic and biogeographic implications

ANNALISA BERTA,<sup>1</sup> SARAH KIENLE,<sup>1</sup> GIOVANNI BIANUCCI,<sup>2</sup> and SILVIA SORBI<sup>3</sup>

<sup>1</sup>Department of Biology, San Diego State University, San Diego, CA 92182,  
aberta@mail.sdsu.edu, [sarah.stachura@gmail.com](mailto:sarah.stachura@gmail.com);

<sup>2</sup>Dipartimento di Scienze della Terra, Università di Pisa, Via S. Maria 53, I-56126,  
Pisa, Italy, [bianucci@dst.unipi.it](mailto:bianucci@dst.unipi.it);

<sup>3</sup>Centro di Ateneo Museo di Storia Naturale, Università di Pisa, Via Roma 79, 56011  
Calci, Pisa, Italy, [silviasorbi@gmail.com](mailto:silviasorbi@gmail.com)

---

<sup>1</sup>Corresponding author

APPENDIX S1. Characters and character-states used in phylogenetic analysis.

- (1) Premaxilla-maxilla suture: external to nasal aperture (0); internal to nasal aperture (1) (Wyss, 1988; modified from Berta and Wyss, 1994 #2).
- (2) Premaxillary-nasal contact: extensive (0); reduced (1); absent (2) (modified from Berta and Wyss, 1994 #1).
- (3) Premaxillary, medial tuberosity: reduced-absent (0); well developed (1) (see Muizon, 1981:24, Fig. 5).
- (4) Mastoid lip: does not cover the external cochlear foramen (0); covers external cochlear foramen (1) (Wyss, 1988; Berta and Wyss, 1994 #36).
- (5) Maxilla, antorbital tuberosity: absent or reduced (0); well developed (1) (Sorbi, 2004b).
- (6) Petrosal, dorsal region: unexpanded (0); expanded (1) (Berta and Wyss, 1994 #29).
- (7) Tympanic bulla does not cover the petrosal posteriorly (0); tympanic bulla covered by petrosal posteriorly (1).
- (8) Premaxillary, lateral triangular extension: absent-reduced (0); well developed (1).
- (9) Diastema between P4 and M1: large (0); reduced (1) (Sorbi, 2004a).
- (10) Mandibular condyle: at or slightly above level of toothrow (0); well elevated above toothrow (1) (Berta and Wyss, 1994 #53).
- (11) Mandibular symphysis: terminates at p2 (0); terminates at p3 (1); terminates at p4 (2) (Koretsky and Grigorescu, 2002 #10).

- (12) Incisors: 3/2 (0); 2/2 (1); 2/1 (2) (Koretsky and Grigorescu, 2002 #18).
- (13) Upper incisors: in straight line (0); in a curved line (slanted) (1) (Koretsky and Grigorescu, 2002 #26).
- (14) Upper incisors, shape in cross-section: round (0); laterally compressed (1) (Wyss, 1988; Bininda-Emonds and Russell, 1996 #130).
- (15) Upper incisors, relative size: outermost incisor equal in size to remaining incisors (0); outermost incisor relatively larger than others (1) (Wyss, 1988; Bininda-Emonds and Russell, 1996 #131).
- (16) Procumbent upper incisors: absent (0); present (1) (Bininda-Emonds and Russell, 1996 #134).
- (17) Basal cingulum of postcanines (P, p1-M, m1): well developed (0); not developed (1) (Koretsky and Grigorescu, 2002 #23).
- (18) Crowns of postcanines: labiolingually compressed (0); labiolingually broad (1) (Cozzuol, 2001 #42).
- (19) p4-m1 alveoli: similar in size (0); p4 alveolus smaller than m1 alveolus (1); p4 alveolus larger than m1 alveolus (2) (Koretsky and Grigorescu, 2002 #16).
- (20) Postcanine accessory cusps: (0) absent; 2 (1); 3 or more (2) (modified from Koretsky and Grigorescu, 2002 #24).
- (21) M1: equal in size to P4 (0); smaller than P4 (1) (this study).
- (22) Premolars: parallel to toothrow axis (0); obliquely oriented in toothrow (1) (Koretsky and Grigorescu, 2002 #25).
- (23) Postcanine teeth, carinae: absent (0); present (1) (this study).
- (24) Postcanine teeth, overlapping: no (0); yes (1) (this study).

(25) Humerus, lesser tubercle and head: equal in height or tubercle insignificantly higher than head (0), tubercle much higher than head (1) (Koretsky and Grigorescu, 2002 #30).

(26) Humerus, deltoid crest: shorter than one-half the length of the bone, confined to the proximal half of bone (0); longer than one-half the length of the bone (1) (modified from Koretsky and Grigorescu, 2002 #34).

(27) Humerus, olecranon fossa: deep (0); shallow (1) (Berta and Wyss, 1994 #92).

(28) Humerus, supracondylar (=entepicondylar) foramen: present (0); absent (1) (Berta and Wyss, 1994 #91).

(29) Humerus, bicipital groove: absent or shallow (0); present (deep) (1).

(30) Humerus, distal portion of shaft: more developed transversely relative to proximal portion (0); less developed transversely relative to proximal portion (1) (Sorbi, 2004a).

(31) Humerus, supinator ridge (= epicondylar crest): well developed (0); absent or poorly developed (1) (Cozzuol, 2001 #6).

(32) Ulna, anconeal tuberosity: well developed and posteriorly positioned on olecranon (0); well developed and anteriorly positioned on olecranon (1); poorly developed (2) (Muizon, 1981).

(33) Ulna, articular facet for cuneiform (=pyramidal): transversely oriented (0); slightly inclined anteroposteriorly (1); nearly perpendicular relative to main axis of ulna (2) (Sorbi, 2004a).

(34) Metacarpal I and metacarpal II: approximately the same length (0); metacarpal I longer than metacarpal II (1) (Cozzuol, 2001; see Wyss, 1988).

- (35) Manus, phalanges: rounded (0); flattened (1) (see Wyss, 1988).
- (36) Manus, intermediate phalanx digit V: unreduced (0); reduced (1) (Wyss, 1988:fig. 5; Berta and Wyss, 1994: #104).
- (37) Manus, ungual phalanges unreduced; shaft longer than 1/3 of the entire length (0); reduced (1); shaft not more 1/3 of the entire length (2) (Sorbi, 2004a; see Wyss, 1988 #22).
- (38) Manus, metacarpophalangeal and interphalangeal articulations: well developed and trochleated (0); reduced, broad and flattened (1) (Wyss, 1988).
- (39) Femur, condyles: different in size (0); similar in size (1) (Koretsky and Grigorescu, 2002 #38).
- (40) Femur epiphyses: distal epiphysis one-fourth to one-fifth wider than proximal (0); widths of proximal and distal epiphyses about equal (1); proximal epiphyses wider than distal (medial) one (2) (Koretsky and Grigorescu, 2002 #39).
- (41) Femur, intercondylar region: narrow and deep (0); wide and flattened (1) (Koretsky and Grigorescu, 2002 #44).
- (42) Femur, head and greater trochanter: same level (0); greater trochanter slightly higher than head (1) (see King, 1966, Muizon, 1982; Bininda-Emonds and Russell 1996).
- (43) Femur, neck: long, slender (0); short, wide (1) (Koretsky and Grigorescu, 2002 #47).
- (44) Femur, trochlea: slightly higher than wide (0); slightly wider than high (1).
- (45) Femur, trochanteric fossa: relatively deep (0); reduced or absent (1) (Berta and Wyss, 1994 #119).

(46) Femur, epicondylar crests: absent or poorly developed (0); well developed (1) (Cozzuol, 2001 #26).

(47) Tibia and fibula: not fused (0); fused proximally (1) (Berta and Wyss, 1994 #122).

(48) Tibia, posterotibial fossa: shallow (0); deep (1) (Cozzuol, 2001 #31).

(49) Astragalus, calcaneal facet (= sustentacular facet): relatively long (0); short (1) (Sorbi, 2004a; see Wyss, 1988 #20).

(50) Astragalus, facet for articulation with tibia: not elevated (0); elevated and forming a calcaneal process (1) (Sorbi, 2004a).

(51) Calcaneum, length: slightly longer than astragalus (0); approximately same length as astragalus (1); shorter than astragalus (2) (Sorbi, 2004a, see Muizon, 1981:68).

(52) Calcaneum, calcaneoastragalar (=proximal astragalar) facet: fibular portion small and forms a right angle with astragalar portion (0); fibular part large and forms a right angle with astragalar portion (1); fibular part large forms an obtuse angle with astragalar portion (2) (Sorbi, 2004a; Muizon, 1981 68).

(53) Calcaneum, calcaneoastragalar facet: forms an oblique angle with the main axis of the bone (0); forms a right angle with main axis of bone (1) (Sorbi, 2004b).

(54) Calcaneum, medial (=greater tuberosity) and lateral calcaneal tubercles: lateral tubercle lower than medial tubercle (0); same elevation (1) (Sorbi, 2004b).

(55) Calcaneum, sulcus for m. peroneus longus with anterior tuberosity: absent-reduced (0); present (1) (Sorbi, 2004b).

(56) Cuboid, contact between posterolateral process and metatarsal V: present (0); reduced-absent (1) (Sorbi, 2004a; see Muizon, 1981:68).

(57) Metatarsal III: approximately equal to the others (0); much shorter (1) (Berta and Wyss, 1994: 106).

(58) Hindflipper, ungual phalanges: unreduced (0); reduced (1) (Berta and Wyss, 1994#107).

#### LITERATURE CITED

- Berta, A., and A. R. Wyss. 1994. Pinniped phylogeny. *Proceedings of San Diego Society of Natural History* 29:33–56.
- Bininda-Emonds O. R. P., and A. P. Russell. 1996. A morphological perspective on the phylogenetic relationships of the extant phocid seals (Mammalia: Carnivora: Phocidae). *Bonner Zoologische Monographien* 41:1–256.
- Cozzuol, M. A. 2001. A ‘northern’ seal from the Miocene of Argentina: implications for phocid phylogeny and biogeography. *Journal of Vertebrate Paleontology* 21:415–421.
- King, J. E. 1966. Relationships of the hooded and elephant seals (Genera *Cystophora* and *Mirounga*). *Journal of the Zoological Society of London* 148: 385–398.
- Koretsky I. A., and D. Grigorescu. 2002. The Fossil Monk Seal *Pontophoca sarmatica* (Alekseev) (Mammalia: Phocidae: Monachinae) from the Miocene of Eastern Europe; pp. 149–162 in R. J. Emry (ed.), *Cenozoic Mammals of Land and Sea:*

Tributes to the Career of Clayton E. Ray. Smithsonian Contributions to  
Paleobiology 93.

Muizon, C. de. 1981. Les vertébrés fossiles de la Formation Pisco (Pérou) Première  
partie: deux nouveaux Monachinae (Phocidae: Mammalia) du Pliocène de Sud  
Sacaco. Institut français d'études andines, Mémoire 6:20–161.

Muizon, C. de. 1982. Phocid phylogeny and dispersal. Annals of the South African  
Museum 89:175–213.

Sorbi, S. 2004a. La *Pliophoca etrusca* (Mammalia: Pinnipedia) del Pliocene toscano:  
nuova descrizione ed inquadramento filogenetico. Tesi di Laurea Università di  
Pisa, Pisa, Italy.

Sorbi, S. 2004b. Primo ritrovamento di *Pliophoca* (Mammalia: Pinnipedia) nel  
Pleistocene toscano: descrizione e comparazione. Tesi di Laurea Specialistica,  
Università di Pisa, Pisa, Italy, 13 pp.

Wyss, A. R. 1988. On “retrogression” in the evolution of the Phocinae and  
phylogenetic affinities of the monk seals. American Museum Novitates 2924:1–  
38.
